## Echocardiographic global longitudinal strain as a marker of myocardial fibrosis predicts outcomes in aortic stenosis

C. Chin<sup>1</sup>, T.T. Le<sup>1</sup>, G. Singh<sup>2</sup>, J. Yip<sup>3</sup>, S.C. Chai<sup>4</sup>, Q.W. Yong<sup>5</sup>, E. Lee<sup>5</sup>, D. Yeo<sup>6</sup>, E. Tay<sup>7</sup>, P.P. Goh<sup>7</sup>, L.F. Ling<sup>8</sup>, A.M. Richards<sup>3</sup>, V. Delgado<sup>2</sup>, Z.P. Ding<sup>1</sup>, L.H. Ling<sup>3</sup>

<sup>1</sup>National Heart Centre Singapore (NHCS), Singapore, Singapore; <sup>2</sup>Leiden University Medical Center, Department of Cardiology, Leiden, Netherlands (The); <sup>3</sup>National University Heart Centre, Singapore, Singapore; <sup>4</sup>Changi General Hospital, Singapore, Singapore; <sup>5</sup>Tan Tock Seng Hospital, Singapore, Singapore; <sup>6</sup>Apex Heart Center, Singapore, Singapore; <sup>7</sup>Asian Heart and Vascular Center, Singapore, Singapore; <sup>8</sup>Khoo Teck Puat Hospital, Singapore, Singapore

**Funding Acknowledgement:** Type of funding sources: Public grant(s) – National budget only. Main funding source(s): National Medical Research Council

**Background:** Left ventricular global longitudinal strain (LV-GLS) by speckle tracking echocardiography (STE) reflects intrinsic myocardial function, influenced by interstitial abnormalities. Cardiovascular magnetic resonance (CMR) detects myocardial fibrosis non-invasively, but it is limited for widespread use. We aim to establish LV-GLS as a marker of replacement myocardial fibrosis on CMR and validate the prognostic value of LV-GLS thresholds associated with fibrosis.

**Methods:** LV-GLS thresholds of replacement fibrosis were established in the derivation cohort: 151 patients (57±10 years; 58% males) with hypertension who underwent STE to measure LV-GLS and CMR for replacement myocardial fibrosis. Prognostic value of the thresholds was validated in a separate outcome cohort: 261 patients with moderate-severe aortic stenosis (AS; 71±12 years; 58% males; NYHA functional class I-II) and preserved LVEF ≥50%. Primary outcome was a composite of cardiovascular mortality, heart failure hospitalization, myocardial infarction and cerebrovascular events.

**Results:** In the derivation cohort, LV-GLS demonstrated good discrimination (c-statistics 0.74; 95% confidence interval: 0.66–0.83;  $P<0.001$ ) and calibration (Hosmer-Lemeshow  $\chi^2=6.37$ ;  $P=0.605$ ) for replacement fibrosis. In the outcome cohort, 52 events occurred over 16 [3.1, 42.0] months of follow-up. Patients with LV-GLS >−15.0% (corresponding to 95% specificity to rule-in myocardial fibrosis) had the worst outcomes compared to patients with LV-GLS <−21.0% (corresponding to 95% sensitivity to rule-out myocardial fibrosis) and those between −21.0 and −15.0% (log-rank  $P<0.001$ ; Figure 1). Furthermore, LV-GLS offered independent prognostic value over clinical variables, AS severity, echocardiographic LVEF and E/e' (hazard ratio 1.18; 95% confidence interval: 1.07 to 1.30;  $P=0.001$ ).

**Conclusions:** LV-GLS thresholds associated with replacement myocardial fibrosis is a novel approach to risk-stratify patients with AS and preserved LVEF (Figure 2).

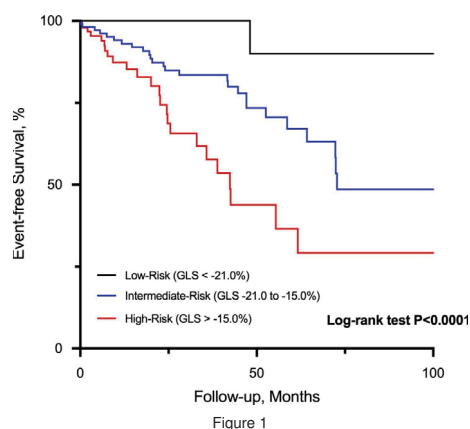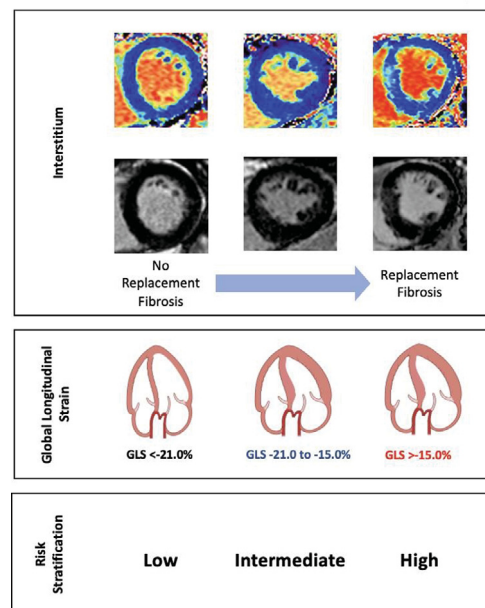

Figure 2
